# Supplementary material
Source: publisher figshare collection journal article supplement (https://diabetesjournals.figshare.com/articles/dataset/_/12311675)
Supplement: Supplementary file 1 [file 1]

**Supplementary Table 1. Pancreatic organ donor characteristics.**

| <b>Sample ID</b> | <b>Clinical phenotype</b> | <b>Age (years)</b> | <b>Sex</b> | <b>Race</b>      | <b>BMI</b> | <b>HLA Risk</b> | <b>Diabetes duration (years)</b> |
|------------------|---------------------------|--------------------|------------|------------------|------------|-----------------|----------------------------------|
| 6013             | Control                   | 65                 | M          | Caucasian        | 24.2       | Neutral         | 0                                |
| 6024             | Control                   | 21                 | M          | Caucasian        | 27.8       | Predisposition  | 0                                |
| 6048             | Control                   | 30                 | M          | Caucasian        | 20.6       | Protective      | 0                                |
| 6075             | Control                   | 16                 | M          | African American | 14.9       | Neutral         | 0                                |
| 6012             | Control                   | 68                 | F          | Caucasian        | 23.7       | Protective      | 0                                |
| 6099             | Control                   | 14.2               | M          | Caucasian        | 30         | Predisposition  | 0                                |
| 6140             | Control                   | 38                 | M          | Caucasian        | 21.7       | Predisposition  | 0                                |
| 6162             | Control                   | 22.7               | M          | African American | 28.9       | Neutral         | 0                                |
| 6168             | Control                   | 51                 | M          | Hispanic/Latino  | 25.2       | Predisposition  | 0                                |
| 6227             | Control                   | 17                 | F          | Caucasian        | 26.4       | Predisposition  | 0                                |
| 6129             | Control                   | 42.9               | F          | Caucasian        | 23.4       | Protective      | 0                                |
| 6165             | Control                   | 45.8               | F          | Caucasian        | 25         | Protective      | 0                                |
| 6102             | Control                   | 45.1               | F          | Caucasian        | 35.1       | Predisposition  | 0                                |
| 6229             | Control                   | 31                 | F          | Caucasian        | 26.9       | Neutral         | 0                                |
| 6251             | Control                   | 33                 | F          | Caucasian        | 29.5       | Neutral         | 0                                |
| 6010             | Control                   | 47                 | F          | Caucasian        | 19.7       | Protective      | 0                                |
| 6179             | Control                   | 21.8               | F          | Caucasian        | 20.7       | Predisposition  | 0                                |
| 6019             | Control                   | 42                 | M          | Caucasian        | 31         | Predisposition  | 0                                |
| 6080             | Antibody+                 | 69.2               | F          | Caucasian        | 21.3       | Neutral         | 0                                |
| 6123             | Antibody+                 | 23.2               | F          | Caucasian        | 17.6       | Neutral         | 0                                |
| 6158             | Antibody+                 | 40.3               | M          | Caucasian        | 29.7       | Neutral         | 0                                |
| 6167             | Antibody+                 | 37                 | M          | Caucasian        | 26.3       | Predisposition  | 0                                |
| 6171             | Antibody+                 | 4.3                | F          | Caucasian        | 14.8       | Predisposition  | 0                                |
| 6044             | Antibody+                 | 41.4               | M          | Hispanic/Latino  | 27.4       | Protective      | 0                                |
| 6101             | Antibody+                 | 64.8               | M          | Caucasian        | 34.3       | Protective      | 0                                |
| 6154             | Antibody+                 | 48.5               | F          | Caucasian        | 24.5       | Protective      | 0                                |
| 6156             | Antibody+                 | 40                 | M          | Caucasian        | 19.8       | Neutral         | 0                                |
| 6181             | Antibody+                 | 31.9               | M          | Caucasian        | 21.9       | Predisposition  | 0                                |
| 6197             | Antibody+                 | 22                 | M          | African American | 28.2       | Neutral         | 0                                |
| 6147             | Antibody+                 | 23.8               | F          | Caucasian        | 32.9       | Neutral         | 0                                |
| 6070             | T1D                       | 22.6               | F          | Caucasian        | 21.6       | Neutral         | 7                                |

|      |     |      |   |                  |       |                |      |
|------|-----|------|---|------------------|-------|----------------|------|
| 6084 | T1D | 14.2 | M | Caucasian        | 26.3  | Predisposition | 4    |
| 6088 | T1D | 31.2 | M | Caucasian        | 27    | Predisposition | 5    |
| 6180 | T1D | 27.1 | M | Caucasian        | 25.9  | Predisposition | 11   |
| 6224 | T1D | 21   | F | Caucasian        | 22.8  | Predisposition | 1.5  |
| 6243 | T1D | 13   | M | Caucasian        | 21.3  | Predisposition | 5    |
| 6228 | T1D | 13   | M | Caucasian        | 17.4  | Predisposition | 0    |
| 6209 | T1D | 5    | F | Caucasian        | 11.95 | Predisposition | 0.25 |
| 6038 | T1D | 37.2 | F | Caucasian        | 30.9  | Predisposition | 20   |
| 6046 | T1D | 18.8 | F | Caucasian        | 25.2  | Predisposition | 8    |
| 6069 | T1D | 22.9 | M | African American | 28.8  | Predisposition | 7    |
| 6195 | T1D | 19.2 | M | Caucasian        | 23.7  | Neutral        | 5    |
| 6052 | T1D | 12   | M | African American | 20.3  | Neutral        | 1    |
| 6268 | T1D | 12   | F | Caucasian        | 26.6  | Predisposition | 3    |
| 6265 | T1D | 11   | M | Caucasian        | 12.9  | Predisposition | 8    |
| 6196 | T1D | 26   | F | African American | 26.6  | Neutral        | 15   |
| 6211 | T1D | 24   | F | African American | 24.4  | Predisposition | 4    |
| 6113 | T1D | 13.1 | F | Caucasian        | 24.8  | Predisposition | 1.58 |
| 6264 | T1D | 12   | F | Caucasian        | 22    | Predisposition | 9    |
| 6235 | T1D | 43.5 | M | Caucasian        | 28.7  | Neutral        | 21   |

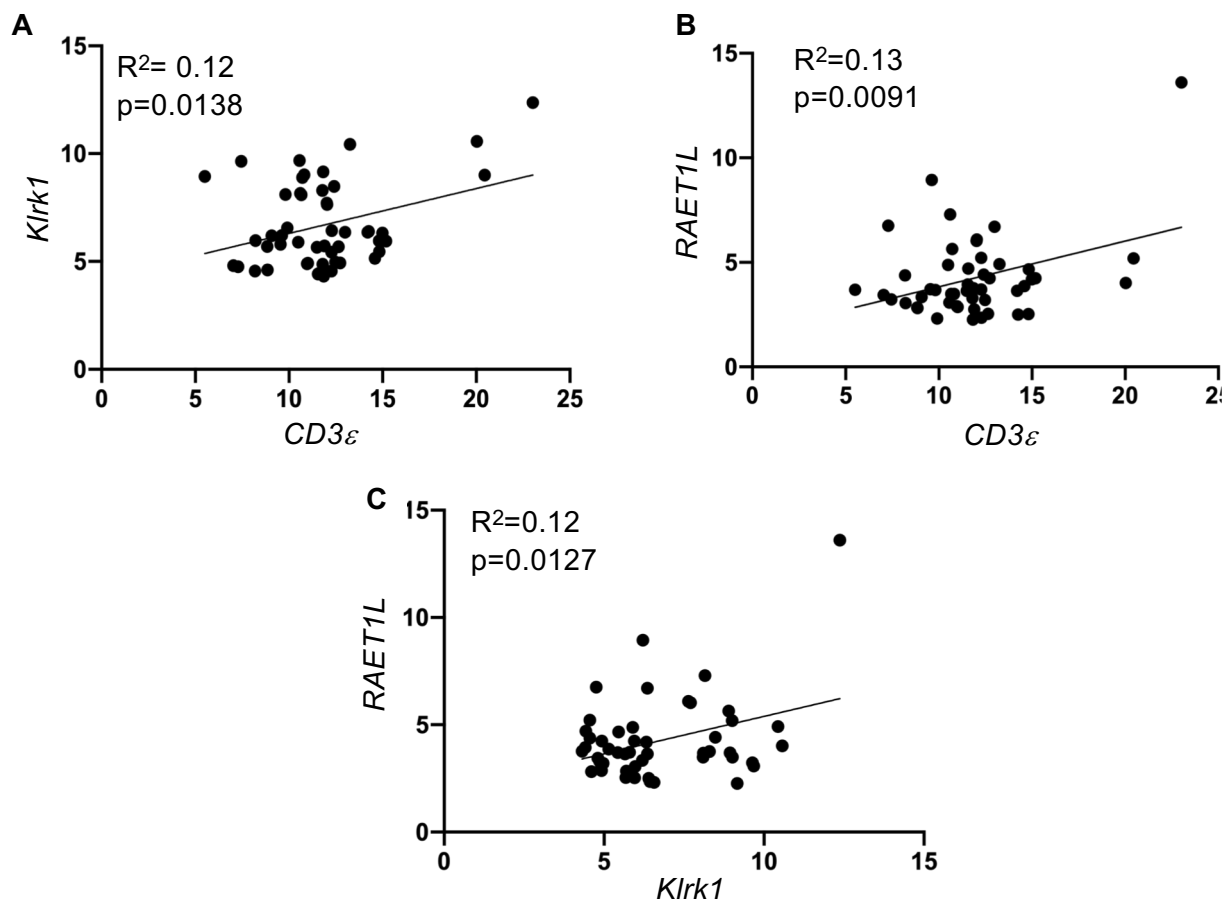

**Supplementary Figure 1. *Klrk1* expression correlates with *CD3ε*, and *RAET1L* expression in human pancreatic islets.**

Linear regression analysis demonstrating a positive correlation between expression of (A) *Klrk1* and *CD3ε*, (B) *RAET1L* and *CD3ε*, and (C) *RAET1L* and *Klrk1* in human pancreatic islets. n=50 (18 controls, 12 Ab+, 20 T1D)

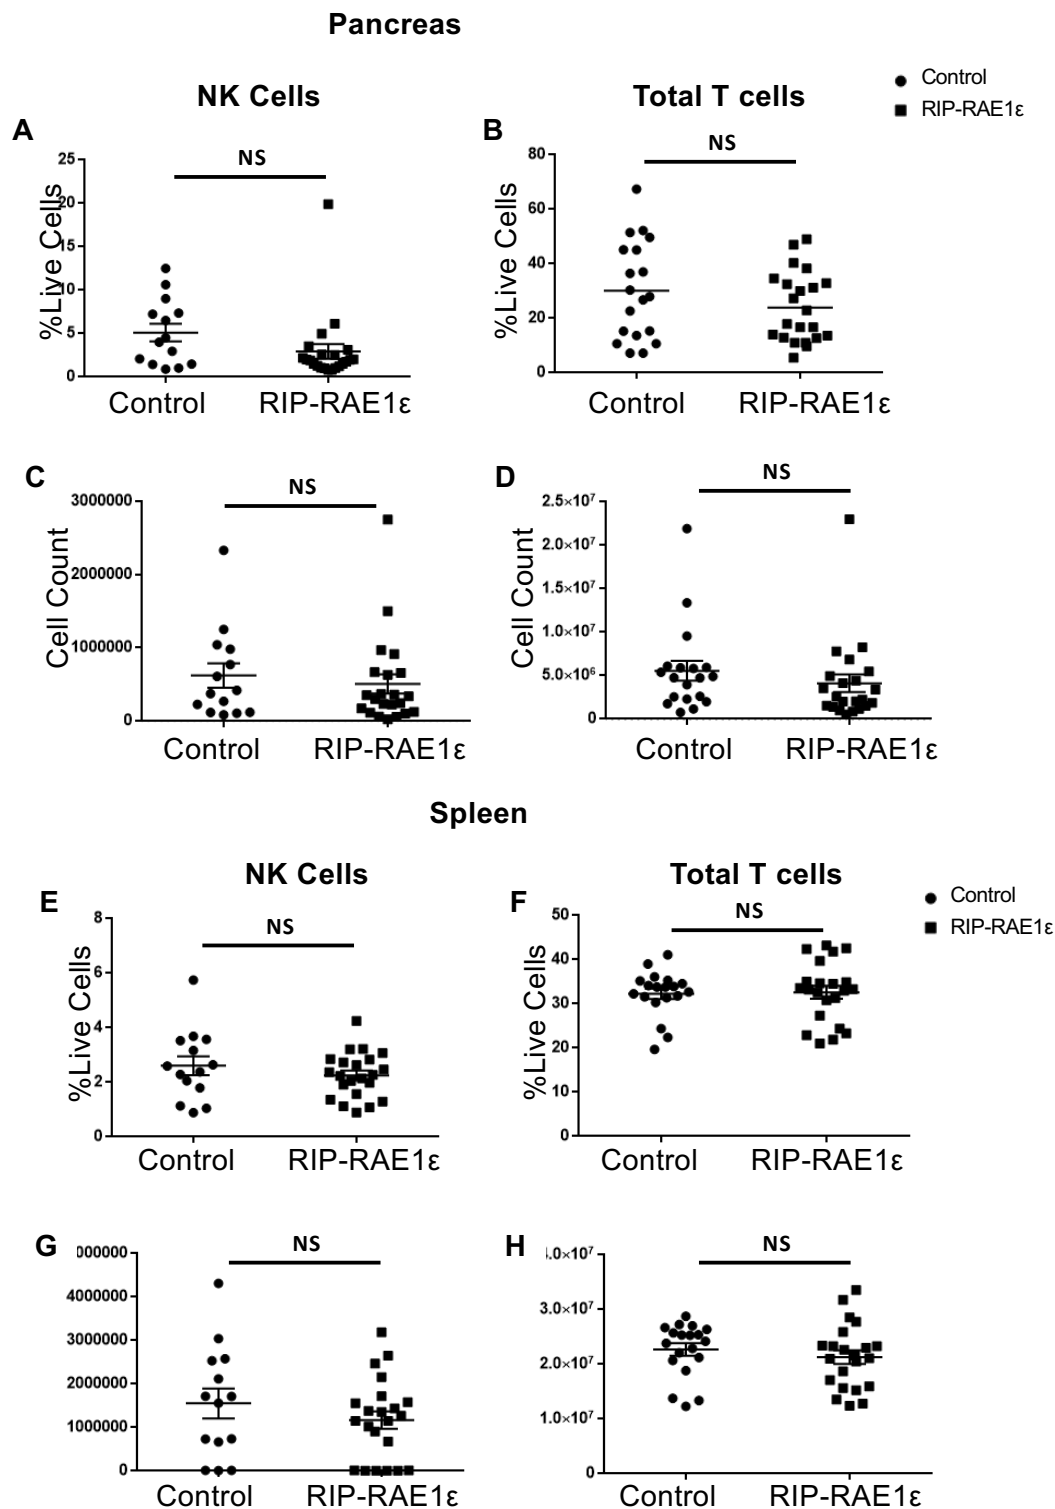

**Supplementary Figure 2. RIP-RAE1ε and control mice have similar numbers of T and NK cells in the pancreata and spleens.** (A, C, E and G) The (A and E) percentage or (C and G) number of NK cells in the (A and C) pancreas or (E and G) spleen of RIP-RAE1ε (n=22) and control (RIP-Cre and PCCALL) (n=19) mice. (B, D, F and H) The (B and F) percentage or (D and G) number of T cells in the (B and D) pancreas or (F and H) spleen of RIP-RAE1ε (n=22) and control (RIP-Cre and PCCALL) (n=19) mice.

## Pancreas

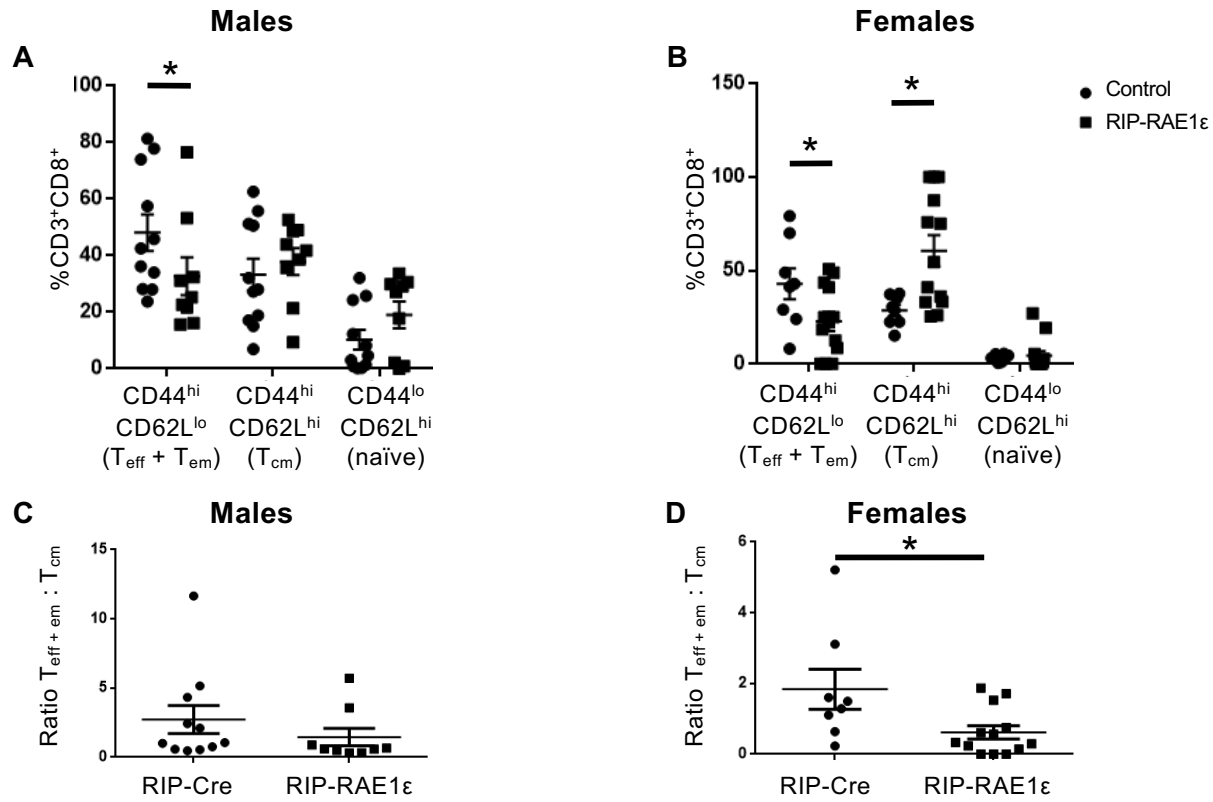

## Spleen

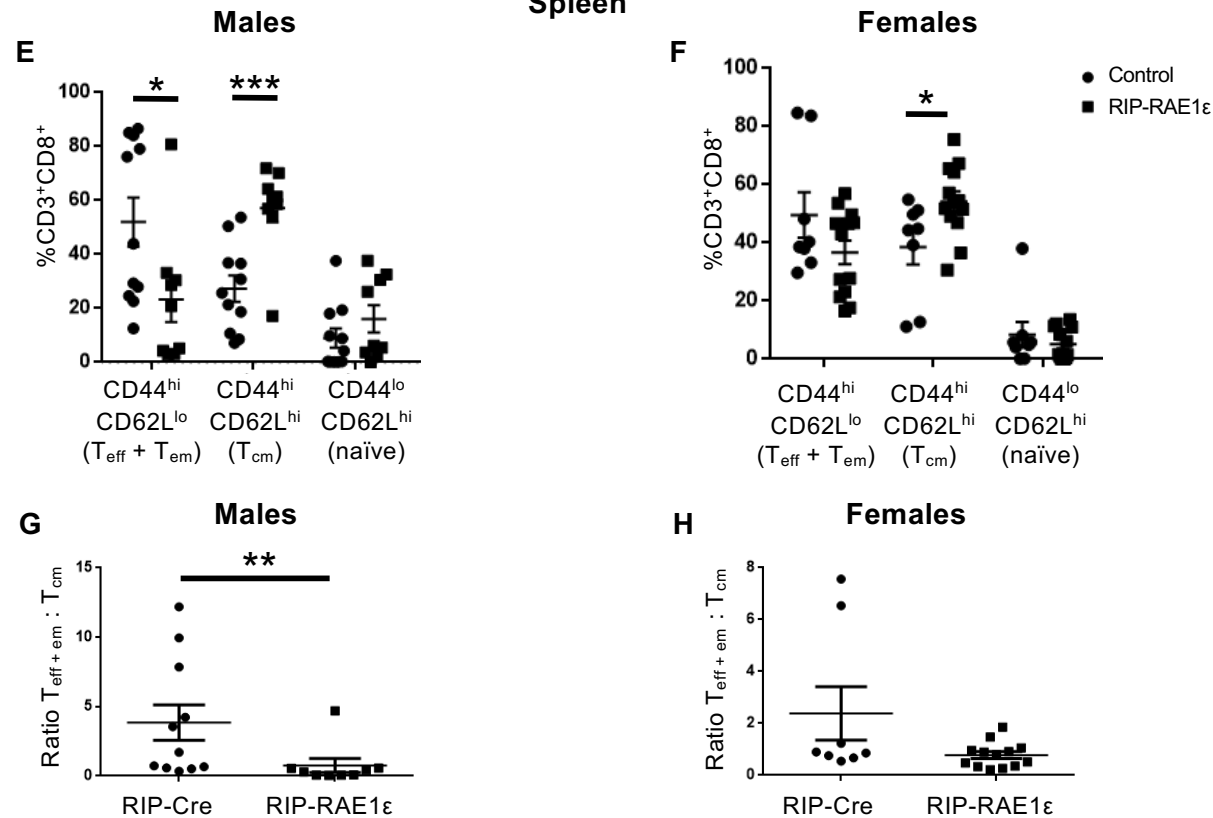

**Supplementary Figure 3. Decreased CD8<sup>+</sup> T<sub>eff+em</sub>:T<sub>cm</sub> ratio in RIP-RAE1ε NOD mice.** (A and B) The percentage of CD3<sup>+</sup>CD8<sup>+</sup> cells that were CD44<sup>hi</sup>CD62L<sup>lo</sup>, CD44<sup>hi</sup>CD62L<sup>hi</sup>, or CD44<sup>lo</sup>CD62L<sup>hi</sup> in the pancreas of (A) male or (B) female RIP-RAE1ε and control (RIP-Cre and PCCALL) mice. (C and D) The CD8<sup>+</sup> T<sub>eff+em</sub>:T<sub>cm</sub> ratio in the spleen of (C) male or (D) female RIP-RAE1ε and control (RIP-Cre and PCCALL) mice. (E and F) The percentage of CD3<sup>+</sup>CD8<sup>+</sup> T cells that were CD44<sup>hi</sup>CD62L<sup>lo</sup>, CD44<sup>hi</sup>CD62L<sup>hi</sup>, or CD44<sup>lo</sup>CD62L<sup>hi</sup> in the spleen of (E) male or (F) female RIP-RAE1ε and control (RIP-Cre and PCCALL) mice. (G and H) The CD8<sup>+</sup> T<sub>eff+em</sub>:T<sub>cm</sub> ratio in the spleen of (G) male or (H) female RIP-RAE1ε and control (RIP-Cre and PCCALL) mice. \*p<0.05 \*\*p<0.01, \*\*\*p<0.001 Mann-Whitney U Test.

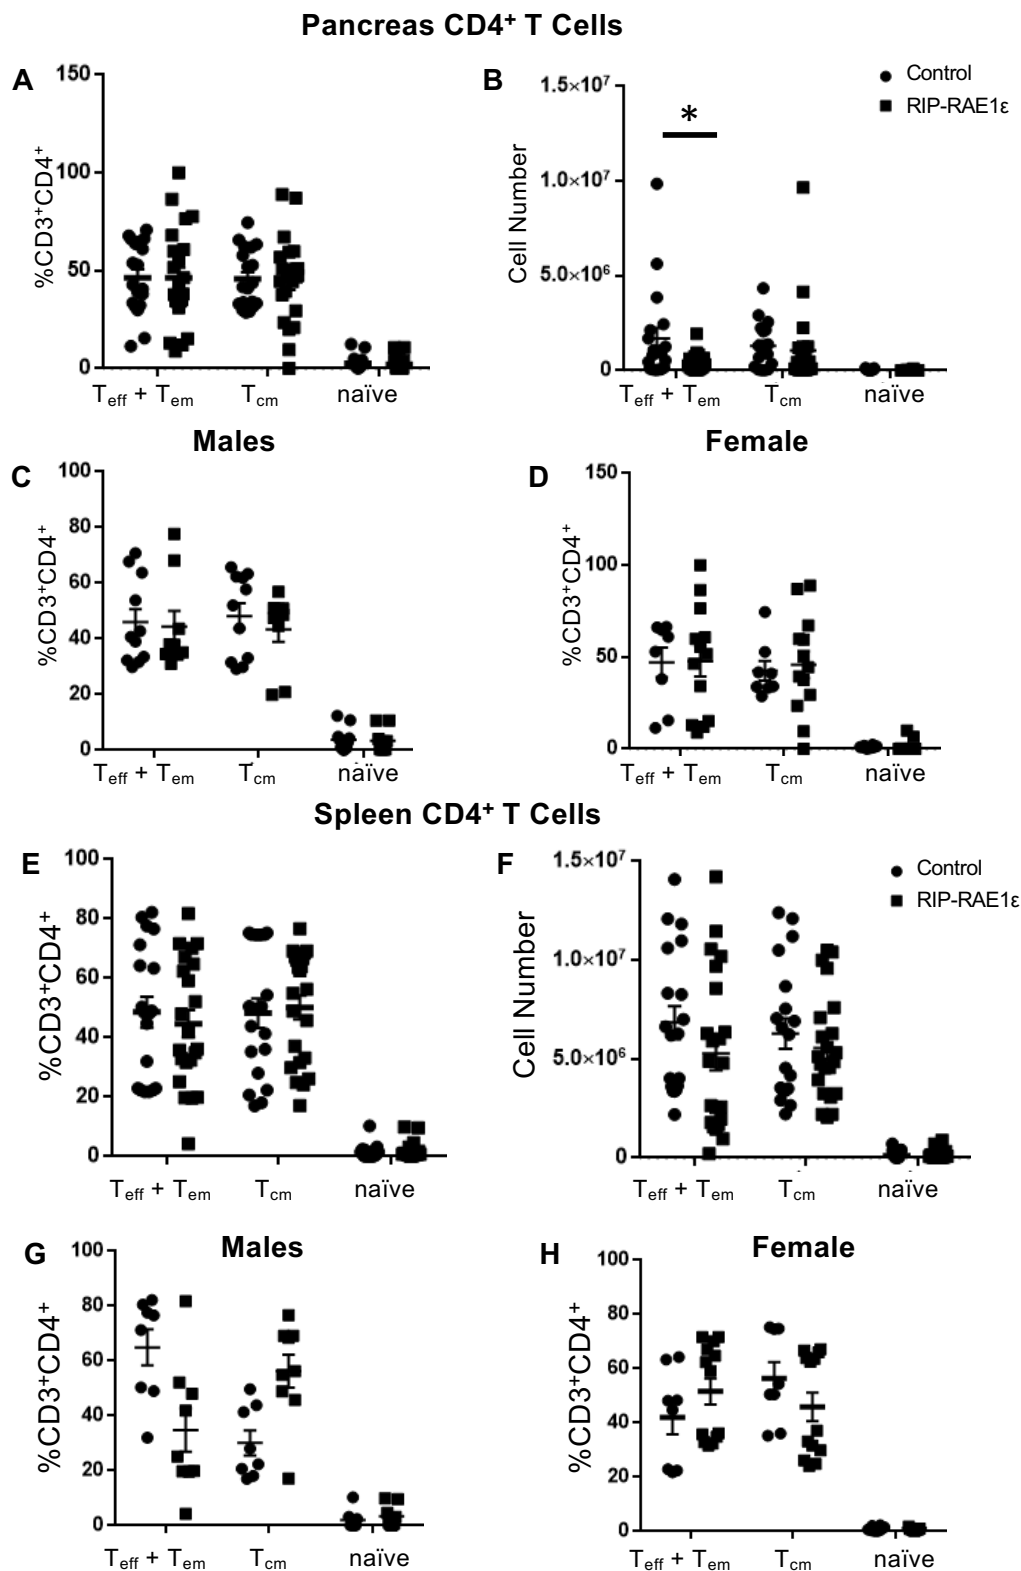

**Supplementary Figure 4. Similar ratio of CD4<sup>+</sup> T<sub>eff</sub>:T<sub>em</sub>:T<sub>cm</sub> in RIP-RAE1 $\epsilon$  and control NOD mice.** (A, C, and D) The percentage of CD3<sup>+</sup>CD4<sup>+</sup> cells that were CD44<sup>hi</sup>CD62L<sup>lo</sup>, CD44<sup>hi</sup>CD62L<sup>hi</sup>, or CD44<sup>lo</sup>CD62L<sup>hi</sup> in the pancreas of (A) all RIP-RAE1 $\epsilon$  and control mice, (C) male RIP-RAE1 $\epsilon$  and control, or (D) female RIP-RAE1 $\epsilon$  and control mice. (B) The number of CD3<sup>+</sup>CD4<sup>+</sup> cells that were CD44<sup>hi</sup>CD62L<sup>lo</sup>, CD44<sup>hi</sup>CD62L<sup>hi</sup>, or CD44<sup>lo</sup>CD62L<sup>hi</sup> in the pancreas of RIP-RAE1 $\epsilon$  and control mice. (E, G, and H) The percentage of CD3<sup>+</sup>CD4<sup>+</sup> cells that were CD44<sup>hi</sup>CD62L<sup>lo</sup>, CD44<sup>hi</sup>CD62L<sup>hi</sup>, or CD44<sup>lo</sup>CD62L<sup>hi</sup> in the spleen of (E) all RIP-RAE1 $\epsilon$  and control mice, (G) male RIP-RAE1 $\epsilon$  and control, or (H) female RIP-RAE1 $\epsilon$  and control mice. (F) The number of CD3<sup>+</sup>CD4<sup>+</sup> cells that were CD44<sup>hi</sup>CD62L<sup>lo</sup>, CD44<sup>hi</sup>CD62L<sup>hi</sup>, or CD44<sup>lo</sup>CD62L<sup>hi</sup> in the spleen of RIP-RAE1 $\epsilon$  and control (RIP-Cre and PCCALL) mice. \*p<0.05, \*\*p<0.01 Mann-Whitney U Test.

**A**

## Gating strategy for human CD8+ T cells

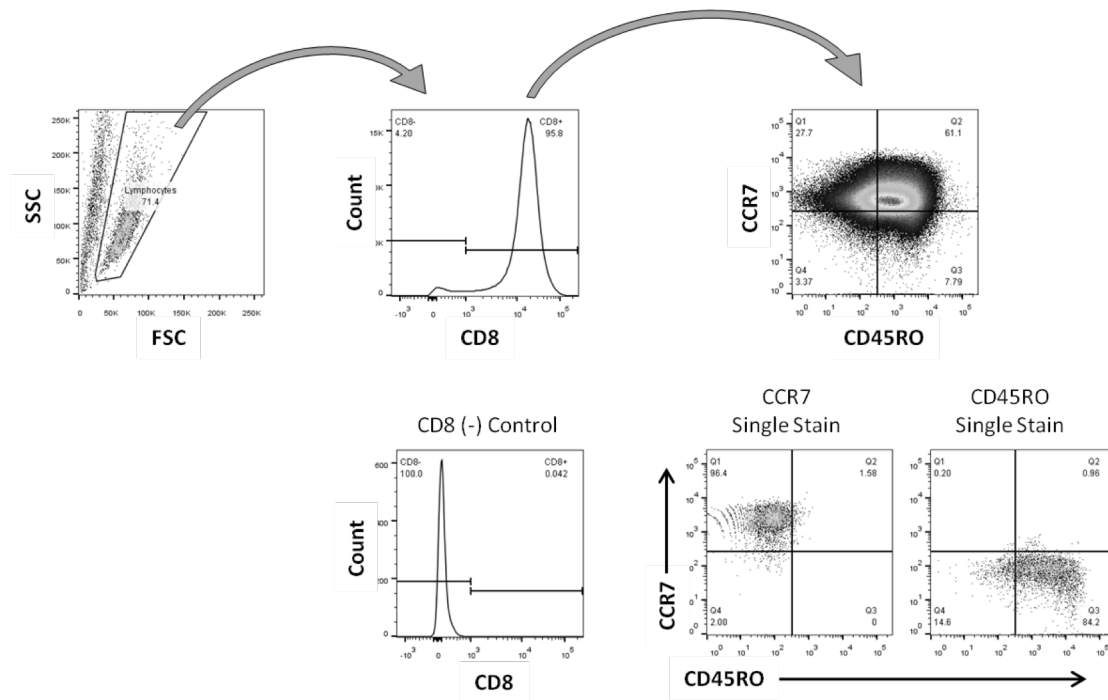

**B**

## NOD CD8+ T cells

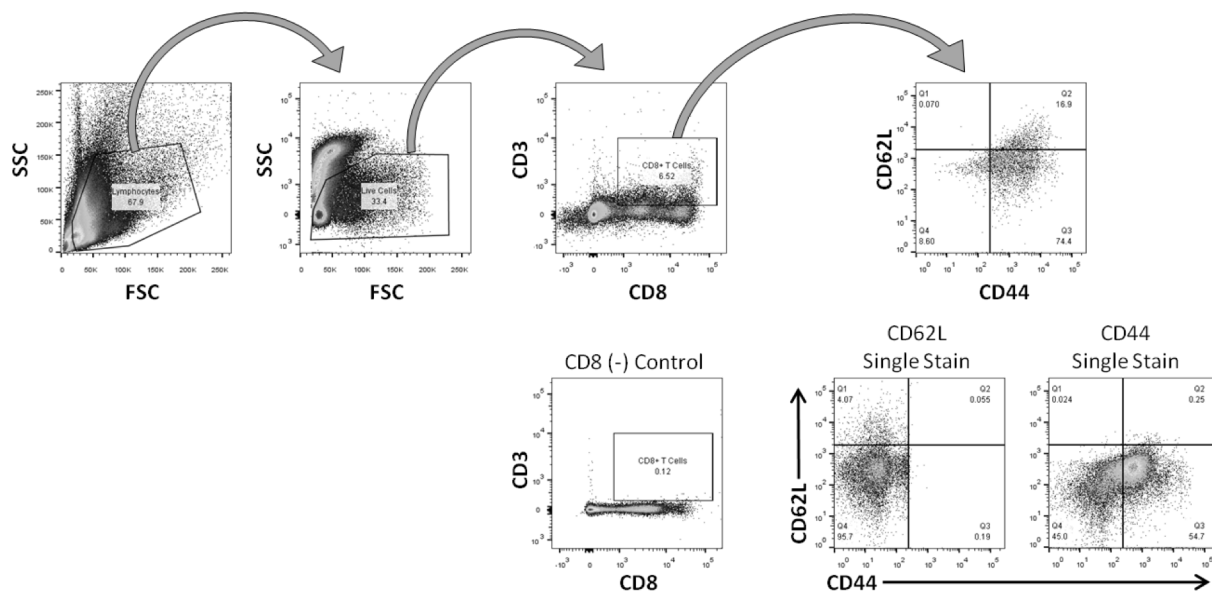

**Supplementary Figure 5. Flow Cytometry Gating Strategies.** Gating strategy for (A) human or (B) mouse CD8+ T cells .
